# Supplementary material for: Exploring the potential of waste biomass of olive as an additive for layered double hydroxide/polyurethane as an effective and safe agent for the adsorption of drug residues: a bioremediation approach
Source: Royal Society of Chemistry journal article supplement (doi:10.1039/d4ma00910j), 2024-01-01
Supplement: d4ma00910j1.pdf [file d4ma00910j1.pdf]

**Table S---** Compare models with the corrected Akaike's Information Criteria for o-Pom.

|                                                 | Langmuir    | Langmuir-Freundlich |
|-------------------------------------------------|-------------|---------------------|
| Sum-of-squares                                  | 22053.49165 | 5940.915324         |
| Number of data points                           | 9           | 9                   |
| Number of parameters                            | 2           | 3                   |
| Akaike's Information Criteria (corrected, AICc) | 81.04       | 76.43               |
| Probability model is correct                    | >99.99%     | >99.99%             |
| Difference in AICc                              | 4.60        |                     |
| Information ratio                               | 10.00       |                     |

*Langmuir-Freundlich* has a lower AICc than Langmuir so is more likely to be the correct model. It is 10.0 times more likely to be correct than *Langmuir*.

Compare models with F test

| Model                             | SS           | DF     |
|-----------------------------------|--------------|--------|
| Langmuir (null)                   | 22053.49165  | 7      |
| Langmuir-Freundlich (alternative) | 5940.915324  | 6      |
| Difference                        | 16112.576326 | 1      |
| Percentage Difference             | 271.21%      | 16.67% |
| Ratio (F)                         | 16.27        |        |
| P value                           | 0.0068       |        |

If *Langmuir* (the null hypothesis) were true, there would be a 0.68% chance of obtaining results that fit *Langmuir-Freundlich* (the alternative hypothesis) so well.

Since the P value is less than the traditional significance level of 5%, you can conclude that the data fit significantly better to *Langmuir-Freundlich* than to *Langmuir*.

Note that the F test assumes that *Langmuir* is a simpler case of *Langmuir-Freundlich*. If this is not the case, you should ignore the F test results.

**Compare models with the corrected Akaike's Information Criteria**

|                                                 | Freundlich  | Langmuir-Freundlich |
|-------------------------------------------------|-------------|---------------------|
| Sum-of-squares                                  | 5940.915324 | 5940.915324         |
| Number of data points                           | 9           | 9                   |
| Number of parameters                            | 2           | 3                   |
| Akaike's Information Criteria (corrected, AICc) | 69.23       | 76.43               |
| Probability model is correct                    | >99.99%     | >99.99%             |
| Difference in AICc                              | 7.20        |                     |
| Information ratio                               | 36.60       |                     |

*Freundlich* has a lower AICc than *Langmuir-Freundlich* so is more likely to be the correct model. It is 36.6 times more likely to be correct than *Langmuir-Freundlich*.

Compare models with F test

The F test is used to compare two nested models. Usually the more complicated model (the one with more parameters) fits better (has a lower SS) than the simpler model. The F test then evaluates the trade-off between better fit, but more complicated model (fewer DF).

For these data, the more complicated model (*Langmuir-Freundlich*) fits the same (equal SS) as the simpler model (*Freundlich*). *Freundlich* is simpler and fits as well. Choose it. You don't need an F test.

Analyze, graph and present your scientific work easily with GraphPad Prism. No coding required.

| Dubinín–Radushkevich  | Langmuir-Freundlich |             |
|-----------------------|---------------------|-------------|
| Sum-of-squares        | 5940.915324         | 5940.915324 |
| Number of data points | 9                   | 9           |

|                                                 |         |         |
|-------------------------------------------------|---------|---------|
| Number of parameters                            | 2       | 3       |
| Akaike's Information Criteria (corrected, AICc) | 69.23   | 76.43   |
| Probability model is correct                    | >99.99% | >99.99% |
| Difference in AICc                              | 7.20    |         |
| Information ratio                               | 36.60   |         |

*Dubinín–Radushkevich* has a lower AICc than *Langmuir-Freundlich* so is more likely to be the correct model.

It is 36.6 times more likely to be correct than *Langmuir-Freundlich*.

Compare models with F test

The F test is used to compare two nested models. Usually the more complicated model (the one with more parameters) fits better (has a lower SS) than the simpler model. The F test then evaluates the trade-off between better fit, but more complicated model (fewer DF).

For these data, the more complicated model (*Langmuir-Freundlich*) fits the same (equal SS) as the simpler model (*Dubinín–Radushkevich*). *Dubinín–Radushkevich* is simpler and fits as well. Choose it. You don't need an F test.

|                                                 |             |             |
|-------------------------------------------------|-------------|-------------|
| Sips                                            | Baudu       |             |
| Sum-of-squares                                  | 5940.915324 | 5940.915324 |
| Number of data points                           | 9           | 9           |
| Number of parameters                            | 3           | 4           |
| Akaike's Information Criteria (corrected, AICc) | 76.43       | 88.43       |
| Probability model is correct                    | >99.99%     | 0.2473%     |
| Difference in AICc                              | 12.00       |             |

|                   |        |
|-------------------|--------|
| Information ratio | 403.43 |
|-------------------|--------|

*Sips* has a lower AICc than *Baudu* so is more likely to be the correct model. It is 403.4 times more likely to be correct than *Baudu*.

Compare models with F test

The F test is used to compare two nested models. Usually the more complicated model (the one with more parameters) fits better (has a lower SS) than the simpler model. The F test then evaluates the trade-off between better fit, but more complicated model (fewer DF).

For these data, the more complicated model (*Baudu*) fits the same (equal SS) as the simpler model (*Sips*). *Sips* is simpler and fits as well. Choose it. You don't need an F test.

|                                                 |             |             |
|-------------------------------------------------|-------------|-------------|
| Redlich-Peterson                                | Baudu       |             |
| Sum-of-squares                                  | 5940.915324 | 5940.915324 |
| Number of data points                           | 9           | 9           |
| Number of parameters                            | 3           | 4           |
| Akaike's Information Criteria (corrected, AICc) | 76.43       | 88.43       |
| Probability model is correct                    | >99.99%     | 0.2473%     |
| Difference in AICc                              | 12.00       |             |
| Information ratio                               | 403.43      |             |

*Redlich-Peterson* has a lower AICc than *Baudu* so is more likely to be the correct model. It is 403.4 times more likely to be correct than *Baudu*.

Compare models with F test

The F test is used to compare two nested models. Usually the more complicated model (the one with more parameters) fits better (has a lower SS) than the simpler model. The F test then evaluates the trade-off between better fit, but more complicated model (fewer DF).

For these data, the more complicated model (*Baudu*) fits the same (equal SS) as the simpler model (*Redlich-Peterson*). *Redlich-Peterson* is simpler and fits as well. Choose it. You don't need an F test.

| Toth                                            | Fritz-Schlunder |             |
|-------------------------------------------------|-----------------|-------------|
| Sum-of-squares                                  | 5940.915324     | 5940.915324 |
| Number of data points                           | 9               | 9           |
| Number of parameters                            | 3               | 4           |
| Akaike's Information Criteria (corrected, AICc) | 76.43           | 88.43       |
| Probability model is correct                    | >99.99%         | 0.2473%     |
| Difference in AICc                              | 12.00           |             |
| Information ratio                               | 403.43          |             |

*Toth* has a lower AICc than Fritz-Schlunder so is more likely to be the correct model. It is 403.4 times more likely to be correct than *Fritz-Schlunder*.

Compare models with F test

The F test is used to compare two nested models. Usually the more complicated model (the one with more parameters) fits better (has a lower SS) than the simpler model. The F test then evaluates the trade-off between better fit, but more complicated model (fewer DF).

For these data, the more complicated model (Fritz-Schlunder) fits the same (equal SS) as the simpler model (Toth). Toth is simpler and fits as well. Choose it. You don't need an F test.
