# Supplementary material for: Exploring the potential of waste biomass of olive as an additive for layered double hydroxide/polyurethane as an effective and safe agent for the adsorption of drug residues: a bioremediation approach
Source: Royal Society of Chemistry journal article supplement (doi:10.1039/d4ma00910j), 2024-01-01
Supplement: d4ma00910j2.pdf [file d4ma00910j2.pdf]

## Supporting information

Exploring the potential waste biomass of Olive as additive to layer double hydroxide/poly urethan as effective and safe agent in the adsorption of drug residues: bioremediation approaches

Table S1 Previous studies in the open literature reporting adsorbents for Cefotaxime removal.

| Adsorbent                                                                                          | pH       | Adsorbent dose                                                | Equilibrium (min) | time | q <sub>max</sub> (mg/g) or %R | Reference        |
|----------------------------------------------------------------------------------------------------|----------|---------------------------------------------------------------|-------------------|------|-------------------------------|------------------|
| hybrid green nanocomposite polymeric beads doped with nano sulfated zirconia                       | 6        | 11.68 mg of beads composite with 2.5wt.% of SZrO <sub>2</sub> | 3.58h             |      | 659                           | [32]             |
| novel NiFe <sub>2</sub> O <sub>4</sub> -COF-chitosan-terephthalaldehyde nanocomposites film (NCCT) | 4        | -                                                             | -                 |      | 309.26                        | [33]             |
| nanocatalysts TiO <sub>2</sub>                                                                     | 4        | 0.2 g/L                                                       | 90 min            |      | removal efficiency 68%        | [34]             |
| Biochar supported bimetallic nanoparticles                                                         | 5        | Co/Fe 0.8g/L                                                  | -                 |      | removal efficiency (99.23%)   | [35]             |
| Chitosan Film                                                                                      | 4        |                                                               | 25hr              |      | 1003.64 mg/g                  | [36]             |
| TiO <sub>2</sub> and SiO <sub>2</sub> Nanoparticles Modified Polyether sulfone Membrane            | 7        | 2.50 g/L                                                      | 120 min           |      | 6.15 mg/g                     | [8]              |
| <b>LDH/PU/O-Pom</b>                                                                                | <b>5</b> | <b>0.09</b>                                                   | -                 |      | <b>250 mg/g</b>               | <b>This work</b> |
| <b>O-Pom</b>                                                                                       | <b>5</b> | <b>0.07</b>                                                   | -                 |      | <b>163.23mg/g</b>             | <b>This work</b> |

Table S2 Band frequencies from the FTIR spectra of O-Pom, LDH/PU, and LDH/PU/O-Pom

| Wavenumber            | Function group  | Band assignments                                          |
|-----------------------|-----------------|-----------------------------------------------------------|
| 3431 cm <sup>-1</sup> | (OH) stretching | Broad peak indicates the presence of hydroxyl (OH) groups |

|                     |                                                  |                                                         |                                                                                                                                                                                                                                                                                     |
|---------------------|--------------------------------------------------|---------------------------------------------------------|-------------------------------------------------------------------------------------------------------------------------------------------------------------------------------------------------------------------------------------------------------------------------------------|
|                     | 3247cm <sup>-1</sup>                             | =CH stretching                                          | Associated with the stretching vibration of =CH bonds                                                                                                                                                                                                                               |
|                     | 2921cm <sup>-1</sup> , 2852 cm <sup>-1</sup>     | C-H stretching                                          | Two Peaks are attributed to stretching vibrations of C-H bonds in aliphatic compounds.                                                                                                                                                                                              |
|                     | 1714 cm <sup>-1</sup>                            | C=O stretching                                          | Stretching vibration of carbonyl (C=O) groups.                                                                                                                                                                                                                                      |
|                     | 1643cm <sup>-1</sup>                             | C=C stretching                                          | Associated with the stretching vibration of C=C bonds in conjugated systems.                                                                                                                                                                                                        |
|                     | 1544 cm <sup>-1</sup>                            | Aromatic C=C stretching                                 | This peak further confirms the presence of aromatic compounds                                                                                                                                                                                                                       |
|                     | 1029 cm <sup>-1</sup>                            | C-O                                                     | The bending vibrations of C-O                                                                                                                                                                                                                                                       |
|                     | 603 cm <sup>-1</sup>                             | C-H bonds                                               | This peak further supports the presence of aromatic compounds and aliphatic chains in pomace.                                                                                                                                                                                       |
|                     | 3446cm <sup>-1</sup>                             | (OH) stretching                                         | In LDH/PU, it could indicate the presence of interlayer water molecules or hydroxide ions, Additionally, it might suggest the presence of hydroxyl-containing functional groups in the PU compound                                                                                  |
| <b>LDH/PU</b>       | 1629 cm <sup>-1</sup>                            | stretching vibration of water molecules                 | stretching vibration of water molecules or hydroxide ions in the interlayer region of LDHs.                                                                                                                                                                                         |
|                     | 1103cm <sup>-1</sup>                             | C-O                                                     | stretching vibrations of C-O bonds                                                                                                                                                                                                                                                  |
|                     | 686cm <sup>-1</sup>                              | M-O                                                     | In LDHs like Zn-Al-LDH, the metal cations (such as zinc and aluminum) are coordinated with oxygen and hydroxide ions in a layered structure. The bending vibrations of metal-oxygen-hydroxide bonds typically occur in the region of 700-600 cm <sup>-1</sup> in the FTIR spectrum. |
|                     | 3452cm <sup>-1</sup>                             | (OH) stretching                                         | It suggests the presence of hydroxyl-containing functional groups, possibly from both the pomace and the LDH component.                                                                                                                                                             |
|                     | 3182cm <sup>-1</sup>                             | =C-H stretching                                         | It further confirms the presence of hydroxyl-containing compounds in the sample                                                                                                                                                                                                     |
|                     | (2935 cm <sup>-1</sup> , 2852 cm <sup>-1</sup> ) | C-H stretching                                          | Stretching vibrations of C-H bonds in aliphatic compounds, such as lipids or carbohydrates present in the pomace                                                                                                                                                                    |
| <b>LDH/PU/O-Pom</b> | 1637cm <sup>-1</sup>                             | stretching vibration of C=C bonds in conjugated systems | Suggesting the presence of aromatic compounds in both the pomace and LDH                                                                                                                                                                                                            |
|                     | 1400cm <sup>-1</sup>                             | vibrations of C-H bonds                                 | Correspond to the bending vibrations of C-H bonds in alkanes or methyl groups present in both the pomace and LDH                                                                                                                                                                    |
|                     | (1143 cm <sup>-1</sup> , 1035 cm <sup>-1</sup> ) | C-O stretching vibrations                               | Correspond to carbohydrates or esters from the pomace component                                                                                                                                                                                                                     |

613 cm<sup>-1</sup>

M-O

Vibrations of metal-oxygen-hydroxide bonds

---

**Table S3:** Adsorption isotherm fitting parameters for drug adsorption onto O-Pom and LDH/O-Pom

| Model                                                                              | Parameter          | O-Pom     | LDH/PU/O-Pom |
|------------------------------------------------------------------------------------|--------------------|-----------|--------------|
| Langmuir $q_e = \frac{q_{max} K_L C_e}{1 + K_L C_e}$                               | $q_{max}$          | 163.23    | 25.00E+01    |
|                                                                                    | $K_L$              | 1.60 E-03 | 1.00 E-03    |
|                                                                                    | $R^2$              | 0.99      | 0.99         |
|                                                                                    | AIC                | 81.04     | 73.54        |
|                                                                                    | $1/n$              | 0.89      | 0.79         |
| Freundlich $q_e = K_f C_e^{1/n}$                                                   | $K_f$              | 0.35      | 0.52         |
|                                                                                    | $R^2$              | 0.99      | 0.99         |
|                                                                                    | AIC                | 69.23     | 63.91        |
|                                                                                    | $q_{MLF}$          | 99.80     | 179.70       |
|                                                                                    | $K_{LF}$           | 3.90E-3   | 1.80E-3      |
| Langmuir-Freundlich $q_e = \frac{q_{max}(K_{LF}C_e)^{MLF}}{1 + (K_{LF}C_e)^{MLF}}$ | $M_{LF}$           | 1.40      | 1.19         |
|                                                                                    | $R^2$              | 0.99      | 0.99         |
|                                                                                    | AIC                | 76.43     | 73.23        |
|                                                                                    | $q_{max}$          | 1.00E+2   | 161.30       |
|                                                                                    | $K_s$              | 3.00E-4   | 4.90E-5      |
| Sips $q_e = \frac{q_{max} K_s (C_e)^{1/ns}}{1 + K_s (C_e)^{1/ns}}$                 | $1/n$              | 1.40      | 1.23         |
|                                                                                    | $R^2$              | 0.99      | 0.99         |
|                                                                                    | AIC                | 76.43     | 73.25        |
|                                                                                    | $K_R$              | 0.22      | 0.22         |
|                                                                                    | $a_R$              | 5.80      | 1.78         |
| Redlich-Peterson $q_e = \frac{K_R C_e}{1 + a_R C_e^{BR}}$                          | $R^2$              | 0.99      | 0.99         |
|                                                                                    | AIC                | 76.43     | 73.25        |
|                                                                                    | $K_T$              | 0.25      | 0.45         |
|                                                                                    | $a_T$              | 6.10 E-3  | 5.77         |
|                                                                                    | $N$                | 0.82      | 2.10         |
| Fritz-Schlunder $q_e = \frac{K_T C_e}{(a_T + C_e^Z)^{1/Z}}$                        | $R^2$              | 0.99      | 0.99         |
|                                                                                    | AIC                | 76.43     | 73.25        |
|                                                                                    | $q_{mFSS}$         | 8.27      | 2.98         |
|                                                                                    | $K_1$              | 0.13      | 0.05         |
|                                                                                    | $K_2$              | 0.42      | 1.00E-4      |
|                                                                                    | $m_1$              | 0.75      | 1.09         |
|                                                                                    | $m_2$              | 0.03      | 1.32         |
|                                                                                    | $R^2$              | 0.98      | 0.99         |
|                                                                                    | AIC                | 88.43     | 91.91        |
|                                                                                    | $Q_n(\text{mg/g})$ | 534.56    | 211.60       |
| Khan $qe = \frac{Q_m b_K C_e}{(1 + b_K C_e)^{a_K}}$                                | $b_K$              | 4.90 E-5  | 1.0E-3       |
|                                                                                    | $a_K$              | 2.65      | 0.64         |
|                                                                                    | $R^2$              | 0.99      | 0.99         |
|                                                                                    | AIC                | 76.43     | 73.25        |

**Table S4:** Summarization of the determined error functions for the non-linear adsorption isotherm models for O-Pom.

| Function                | Langmuir | Freundlich | Dubbin | Langmuir-Freundlich | Sips   | Redlich-Peterson | Baudu  | Fritz   | Khan   | Toth   |
|-------------------------|----------|------------|--------|---------------------|--------|------------------|--------|---------|--------|--------|
| SSE/ ERRSQ              | 52.72    | 23.394     | 295.25 | 19.115              | 19.12  | 11.08            | 19.427 | 125.25  | 41.829 | 66.03  |
| X2                      | 2.17     | 1.02       | 18.99  | 0.924               | 0.904  | 0.36             | 0.945  | 0.633   | 1.797  | 2.975  |
| R2                      | 0.992    | 0.997      | 0.958  | 0.998               | 0.997  | 0.998            | 0.997  | 0.983   | 0.994  | 0.991  |
| Adjusted R <sup>2</sup> | 0.971    | 0.991      | 0.889  | 0.992               | 0.992  | 0.995            | 0.989  | 0.911   | 0.982  | 0.972  |
| MAE                     | 2.16     | 1.47       | 5.17   | 1.251               | 1.257  | 0.949            | 1.26   | 0.3.269 | 1.987  | 2.39   |
| MAPE / ARE              | 11.198   | 6.728      | 29.09  | 7.419               | 7.35   | 4.22             | 7.51   | 20.080  | 10.249 | 13.26  |
| RMSE                    | 2.42     | 1.61       | 5.728  | 1.457               | 1.458  | 1.109            | 1.469  | 3.73    | 2.155  | 2.708  |
| NRMSE                   | 0.082    | 0.054      | 0.193  | 0.0497              | 0.049  | 0.037            | 0.05   | 0.127   | 0.0735 | 0.0924 |
| HYBRID                  | 20.157   | 8.65       | 37.40  | 11.129              | 11.02  | 6.33             | 13.52  | 45.18   | 15.37  | 19.89  |
| MPSD                    | 21.035   | 11.699     | 51.126 | 15.957              | 15.73  | 6.7              | 17.719 | 48.02   | 17.43  | 23.49  |
| SAE / EABS              | 19.45    | 13.24      | 46.539 | 11.265              | 11.309 | 8.54             | 11.376 | 29.42   | 17.887 | 21.52  |
| RMS                     | 15.679   | 10.31      | 45.089 | 13.029              | 12.84  | 5.47             | 13.207 | 32.016  | 14.24  | 19.18  |
| NSD                     | 0.157    | 0.1030     | 0.450  | 0.130               | 0.128  | 0.055            | 0.132  | 0.322   | 0.14   | 0.192  |

**Table S5:** Summarization of the determined error functions for the non-linear adsorption isotherm models for LDH/PU/O-Pom

| Function                | Langmuir | Freundlich | Dubbin | Langmuir-Freundlich | Sips  | Redlich-Peterson | Baudu | Fritz  | Khan   | Toth  |
|-------------------------|----------|------------|--------|---------------------|-------|------------------|-------|--------|--------|-------|
| SSE ERRSQ               | 44.41    | 47.107     | 133.43 | 31.98               | 32.35 | 30.19            | 33.56 | 31.45  | 38.05  | 28.98 |
| X2                      | 1.496    | 1.167      | 13.23  | 1.318               | 1.56  | 0.87             | 1.176 | 1.055  | 0.991  | 0.804 |
| R2                      | 0.994    | 0.993      | 0.98   | 0.995               | 0.995 | 0.996            | 0.995 | 0.996  | 0.995  | 0.995 |
| Adjusted R <sup>2</sup> | 0.982    | 0.981      | 0.948  | 0.984               | 0.984 | 0.985            | 0.978 | 0.969  | 0.981  | 0.985 |
| MAE                     | 2.048    | 1.953      | 3.489  | 1.636               | 1.659 | 1.66             | 1.64  | 1.53   | 1.789  | 1.55  |
| MAPE / ARE              | 9.24     | 7.558      | 31.39  | 8.65                | 9.61  | 7.419            | 7.78  | 7.19   | 7.695  | 6.87  |
| RMSE                    | 2.35     | 2.426      | 4.08   | 1.999               | 2.01  | 1.94             | 2.048 | 1.98   | 2.18   | 1.90  |
| NRMSE                   | 0.0978   | 0.101      | 0.169  | 0.082               | 0.083 | 0.081            | 0.085 | 0.082  | 0.0905 | 0.079 |
| HYBRID                  | 12.32    | 10.067     | 41.86  | 13.84               | 15.37 | 11.87            | 15.57 | 19.17  | 12.31  | 10.99 |
| MPSD                    | 13.596   | 11.32      | 57.81  | 19.43               | 21.87 | 12.52            | 19.43 | 21.24  | 12.34  | 12.51 |
| SAE / EABS              | 16.389   | 15.63      | 27.92  | 13.089              | 13.28 | 13.29            | 13.13 | 12.27  | 14.34  | 12.40 |
| RMS                     | 11.77    | 9.80       | 50.06  | 15.36               | 17.29 | 9.89             | 13.74 | 13.004 | 9.75   | 9.89  |

**Table S6:** A summary of nonlinear kinetic models for O-Pom and LDH/PU/O-Pom for adsorption of Cefotaxime

| Kinetic models                 | Equation                                              | Parameters | O-Pom     | LDH/PU/O-Pom |
|--------------------------------|-------------------------------------------------------|------------|-----------|--------------|
| <b>Pseudo first Order</b>      | $q_t = q_c (1 - e^{-k_1 t})$                          | $K_1$      | 1.80 E+05 | 1.86 E+05    |
|                                |                                                       | $Q_c$      | 30.00     | 31.90        |
|                                |                                                       | $R^2$      | 0.97      | 0.94         |
| <b>Pseudo second Order</b>     | $q_t = \frac{q_c^2 k_2 t}{1 + q_c k_2 t}$             | $K_2$      | 1.03 E+06 | 1.03E+06     |
|                                |                                                       | $Q_c$      | 30.00     | 31.90        |
|                                |                                                       | $R^2$      | 0.97      | 0.94         |
| <b>Mixed 1,2 order</b>         | $q_t = q_c \frac{(1 - \exp(-kt))}{1 - f_2 \exp(-kt)}$ | $K$        | 0.001     | 0.001        |
|                                |                                                       | $Q_c$      | 31.50     | 33.52        |
|                                |                                                       | $F_2$      | 0.99      | 0.99         |
|                                |                                                       | $R^2$      | 0.99      | 0.97         |
| <b>Avrami</b>                  | $q_t = q_c [1 - \exp(-k_{av} t)^{n_{av}}]$            | $Q_c$      | 30.00     | 31.90        |
|                                |                                                       | $K_{av}$   | 1.81      | 1.81         |
|                                |                                                       | $n_{av}$   | 1.71      | 1.71         |
|                                |                                                       | $R^2$      | 0.97      | 0.94         |
| <b>Intraparticle diffusion</b> | $q_t = K_{ip} \sqrt{t} + C_{ip}$                      | $K_{ip}$   | 1.34      | 1.60         |
|                                |                                                       | $C_{ip}$   | 17.88     | 17.82        |
|                                |                                                       | $R^2$      | 0.39      | 0.49         |
